# Supplementary material for: In Healthy Young Men, a Short Exhaustive Exercise Alters the Oxidative Stress Only Slightly, Independent of the Actual Fitness
Source: Hindawi journal article supplement (doi:10.1155/2016/9107210), 2016-01-01

Fig. 1S. Apparent statistically significant ( $P < 0.05$ ) inverse correlations between physical exercise-induced changes in the levels of OS biomarkers and their initial levels (before the exercise).

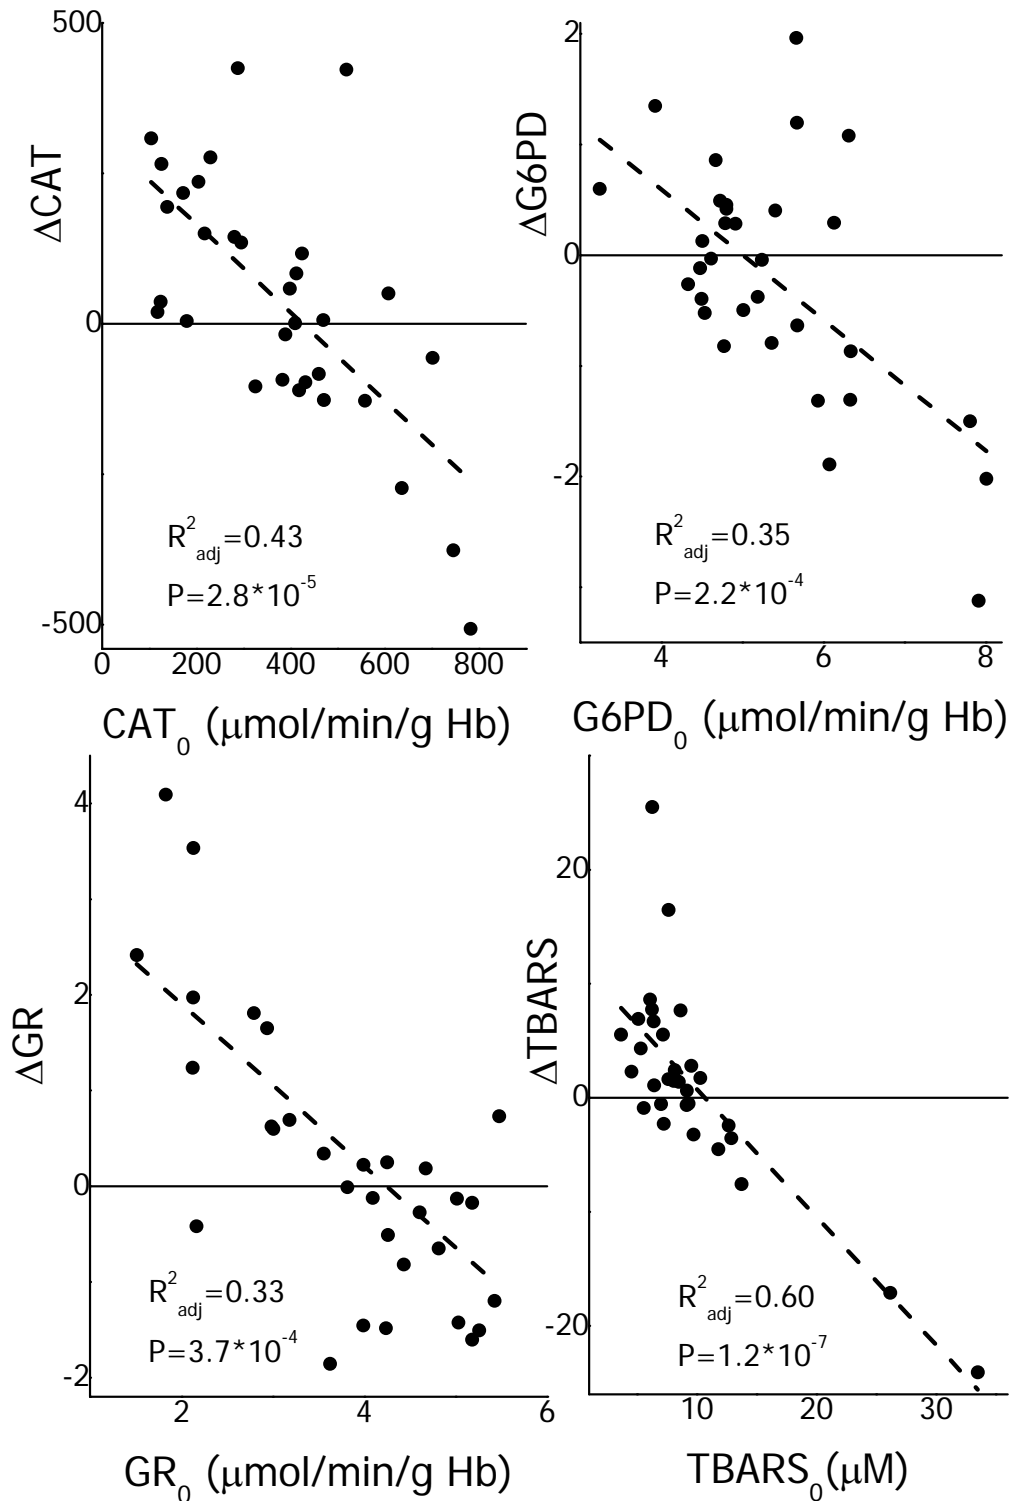

Supplement: f1 [file 9107210.f1.pdf]
